# Supplementary material for: Response of the Five Highbush Blueberry Cultivars to In Vitro Induced Drought Stress by Polyethylene Glycol
Source: MDPI journal article supplement (doi:10.3390/agronomy12030732), 2022-03-17
Supplement: s1 [file s1]

**Supplementary Figure S1.** Principal component analysis. Changes in all the measured parameters with respect to the control, PEG-free medium in five cultivars of *Vaccinium corymbosum* L. in correlation to the PEG 6000 concentration of the culture medium. The parameters examined were: (a) shoot length (cm); (b) average number of shoots / culture vessel; (c) proliferation rate; (d) fresh weight (mg); (e) Water content (%); (f) chlorophyll a (mg / g FW); (g) chlorophyll b (mg / g FW); (h) Carotenoid (mg / g FW)]. Different concentrations of polyethyleneglycol (PEG 6000): 0 g / L, 10 g / L, 20 g / L, 30 g / L, 40 g / L, 50 g / L. were added to induce drought stress in the culture medium [Woody plant medium (WPM) + 100 mg / l Sequestren 138 + 1 mg / L zeatin (Z) + 4 g / L Plant agar, pH = 5] and mini shoots of 1.5-2 cm from five highbush blueberry cultivars (Bluecrop, Briggita Blue, Duke, Goldtraube and Hortblue Petite) were inoculated. After 12 weeks of this conditions ( $22 \pm 1^\circ\text{C}$ ,  $32.4 \text{ mmol}\cdot\text{m}^{-2}\cdot\text{s}^{-1}$ , 16-h photoperiod) 8 indices were measured.

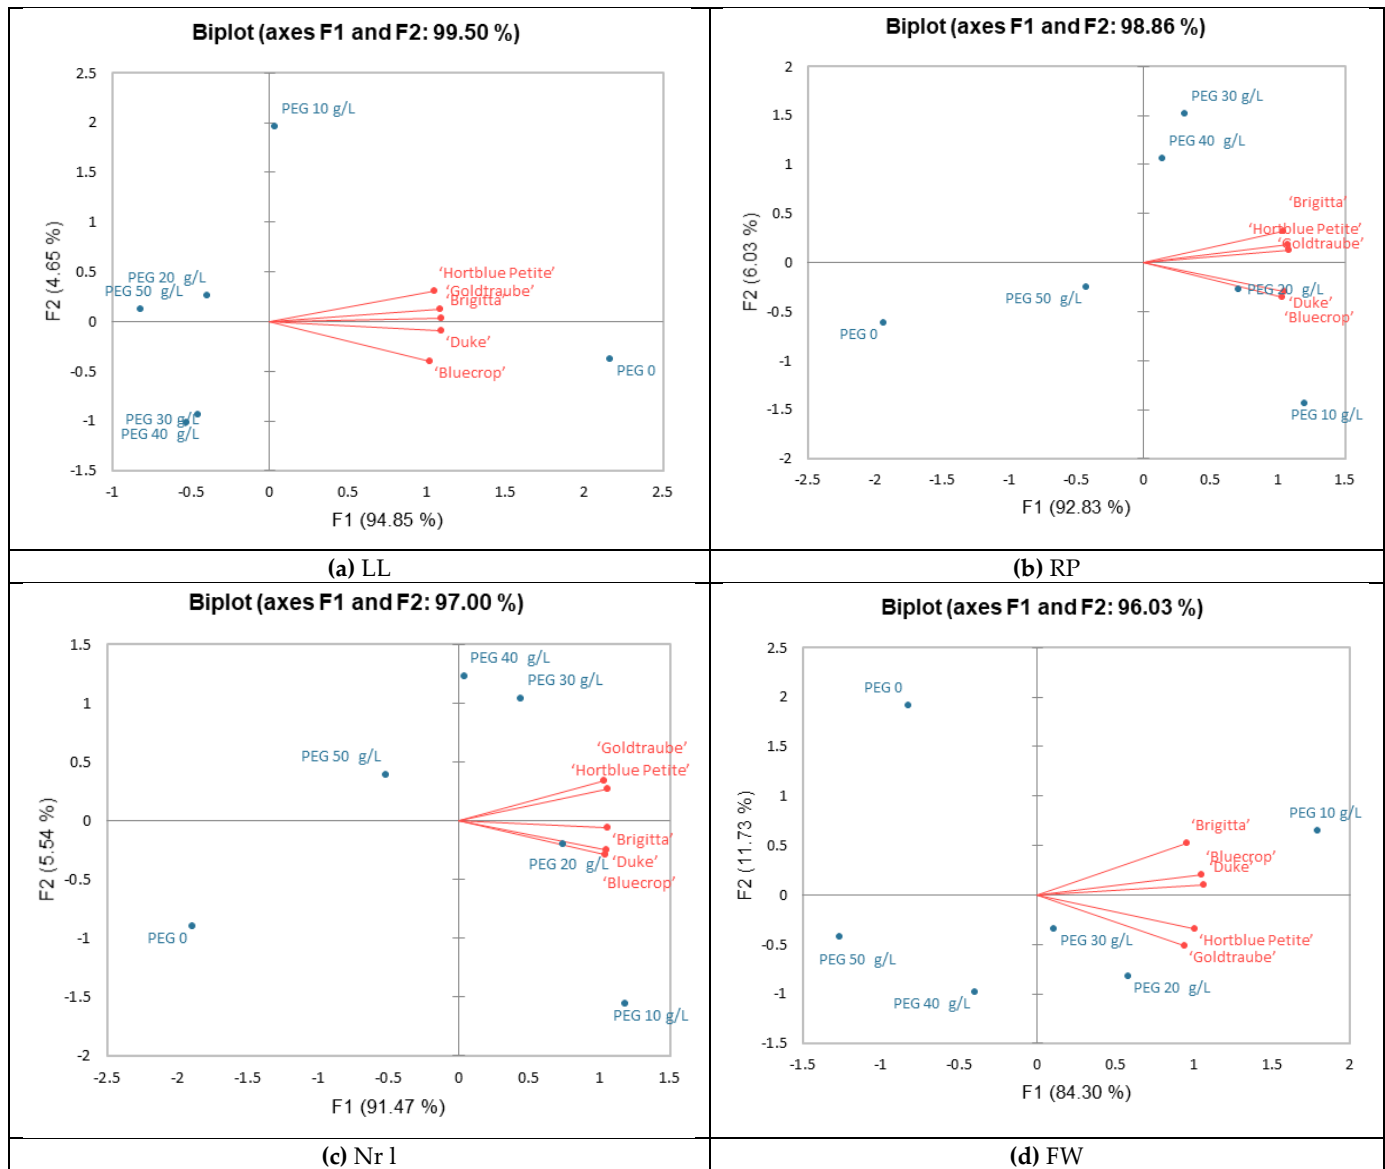

**Biplot (axes F1 and F2: 96.01 %)**

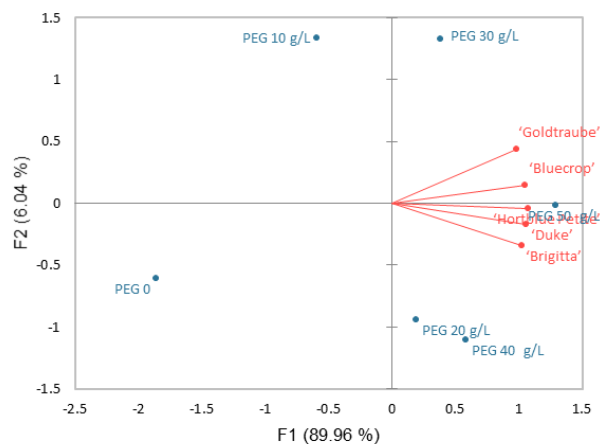

**(e) WC**

**Biplot (axes F1 and F2: 93.89 %)**

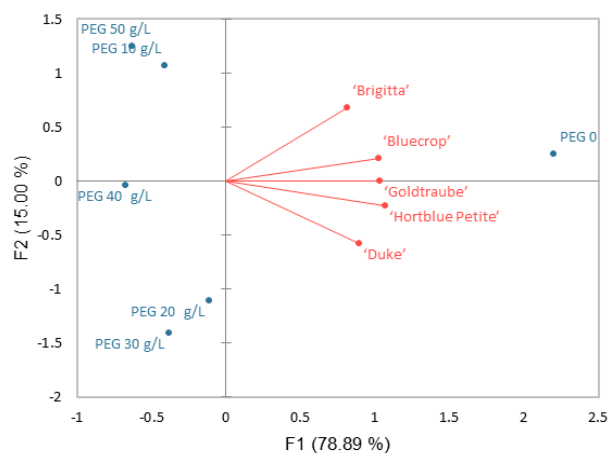

**(f) Chl a**

**Biplot (axes F1 and F2: 92.52 %)**

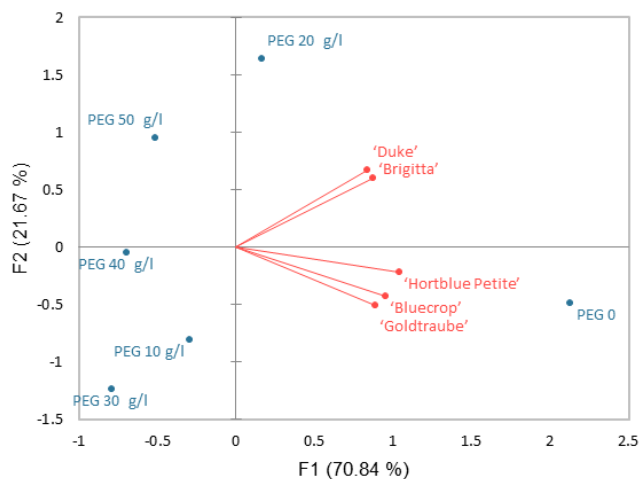

**(g) Chl b**

**Biplot (axes F1 and F2: 97.55 %)**

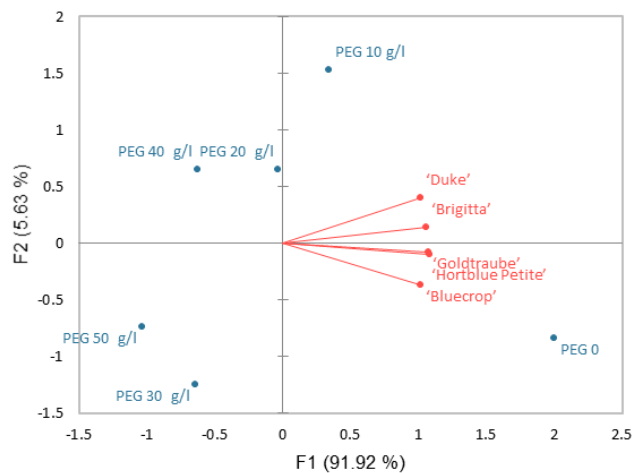

**(h) caro**
