# Supplementary material for: Response of the Five Highbush Blueberry Cultivars to In Vitro Induced Drought Stress by Polyethylene Glycol
Source: MDPI journal article supplement (doi:10.3390/agronomy12030732), 2022-03-17
Supplement: s1 [file s1]

**Supplementary Table S1.** Drought tolerance efficiency of five *V. Corymbosum* cultivars under drought stress. Different concentrations of polyethyleneglycol (PEG 6000): 0 g / L, 10 g / L, 20 g / L, 30 g / L, 40 g / L, 50 g / L. were added to induce drought stress in the culture medium [Woody plant medium (WPM) + 100 mg / l Sequestren 138 + 1 mg / L zeatin (Z) + 4 g / L Plant agar, pH = 5]. After 12 weeks treatment ( $22 \pm 1^\circ\text{C}$ ,  $32.4 \text{ mmol}\cdot\text{m}^{-2}\cdot\text{s}^{-1}$ , 16-h photoperiod), 8 indices were measured and drought tolerance efficiency of each species of each index were calculated. [SL - shoot length (cm); SN - average number of shoots / culture vessel), (PR - proliferation rate; FW - fresh weight (mg); WC - Water content (%); Chla - chlorophyll a (mg / g FW); Chlb - chlorophyll b (mg) / g FW); Caro - Carotenoid (mg / g FW)].

| Inficators | 'Bluecrop' | 'Brigitta' | 'Duke'   | 'Goldtraube' | 'Hortblue Petite' |
|------------|------------|------------|----------|--------------|-------------------|
| SL         | 0.814647   | 0.508749   | 0.760934 | 0.653212     | 0.551076          |
| SN         | 2.028194   | 1.986026   | 1.758763 | 1.667062     | 1.814956          |
| PR         | 2.03112    | 2.098701   | 1.671344 | 1.543511     | 1.826124          |
| FW         | 1.101162   | 0.90038    | 1.472241 | 2.370017     | 1.097265          |
| WC         | 1.086737   | 1.055993   | 1.114267 | 1.10367      | 1.087152          |
| Chla       | 0.475651   | 0.839698   | 0.642194 | 0.548447     | 0.469155          |
| Chlb       | 0.405681   | 0.848521   | 0.603153 | 0.557189     | 0.419883          |
| Caro       | 0.497984   | 1.667857   | 0.792648 | 0.852999     | 0.761933          |
